# Data-driven identification of potential Zika virus vectors

Michelle V. Evans<sup>1,5\*</sup>, Tad A. Dallas<sup>1,2</sup>, Barbara A. Han<sup>3</sup>, Courtney C. Murdock<sup>1,4,5,6,7,8</sup>, John M. Drake<sup>1,5,8</sup>

**1** Odum School of Ecology, University of Georgia, Athens, GA, USA

**2** Department of Environmental Science and Policy, University of California-Davis, Davis, CA, USA

**3** Cary Institute of Ecosystem Studies, Millbrook, NY, USA

**4** Department of Infectious Disease, University of Georgia, Athens, GA, USA

**5** Center for the Ecology of Infectious Diseases, University of Georgia, Athens, GA, USA

**6** Center for Tropical Emerging Global Diseases, University of Georgia, Athens, GA, USA

**7** Center for Vaccines and Immunology, University of Georgia, Athens, GA, USA

**8** River Basin Center, University of Georgia, Athens, GA, USA

\*Corresponding Author: mvevans@uga.edu

## Abstract

Zika is an emerging virus whose rapid spread is of great public health concern. Knowledge about transmission remains incomplete, especially concerning potential transmission in geographic areas in which it has not yet been introduced. To identify unknown vectors of Zika, we developed a data-driven model linking vector species and the Zika virus via vector-virus trait combinations that confer a propensity toward associations in an ecological network connecting flaviviruses and their mosquito vectors. Our model predicts that thirty-five species may be able to transmit the virus, seven of which are found in the continental United States, including *Culex quinquefasciatus* and *Cx. pipiens*. We suggest that empirical studies prioritize these species to confirm predictions of vector competence, enabling the correct identification of populations at risk for transmission within the United States.

# Introduction

In 2014, Zika virus was introduced into Brazil and Haiti, from where it rapidly spread throughout the Americas. By January 2017, over 100,000 cases had been confirmed in 24 different states in Brazil ([http://ais.paho.org/phil/viz/ed\\_zika\\_cases.asp](http://ais.paho.org/phil/viz/ed_zika_cases.asp)), with large numbers of reports from many other countries in South and Central America (Faria et al. 2016). Originally isolated in Uganda in 1947, the virus remained poorly understood until it began to spread within the South Pacific, including an outbreak affecting 75% of the residents on the island of Yap in 2007 (49 confirmed cases) and over 32,000 cases in the rest of Oceania in 2013-2014, the largest outbreak prior to the Americas (2016-present) (Cao-Lormeau et al. 2016, Duffy et al. 2009). Guillian-Barré syndrome, a neurological pathology associated with Zika virus infection, was first recognized at this time (Cao-Lormeau et al. 2016). Similarly, an increase in newborn microcephaly was found to be correlated with the increase in Zika cases in Brazil in 2015 and 2016 (Schuler-Faccini et al. 2016). For this reason, in February 2016, the World Health Organization declared the American Zika virus epidemic to be a Public Health Emergency of International Concern.

Despite its public health importance, the ecology of Zika virus transmission has been poorly understood until recently. It has been presumed that *Aedes aegypti* and *Ae. albopictus* are the primary vectors due to epidemiologic association with Zika virus (Messina et al. 2016), viral isolation from and transmission experiments with field populations (especially in *Ae. aegypti* (Haddow et al. 2012, Boorman and Porterfield 1956, Haddow et al. 1964)), and association with related arboviruses (e.g. dengue fever virus, yellow fever virus). Predictions of the potential geographic range of Zika virus in the United States, and associated estimates for the size of the vulnerable population, are therefore primarily based on the distributions of *Ae. aegypti* and *Ae. albopictus*, which jointly extend across the Southwest, Gulf coast, and mid-Atlantic regions of the United States (Centers for Disease Control and Prevention 2016). We reasoned, however, that if other, presently unidentified Zika-competent mosquitoes exist in the Americas, then these projections may be too restricted and therefore optimistically biased. Additionally, recent experimental studies show that the ability of *Ae. aegypti* and *Ae. albopictus* to transmit the virus varies significantly across mosquito populations and geographic regions (Chouin-Carneiro et al. 2016), with some pop-

ulations exhibiting low dissemination rates even though the initial viral titer after inoculation may be high (Diagne et al. 2015). This suggests that in some locations other species may be involved in transmission. The outbreak on Yap, for example, was driven by a different species, *Ae. hensilli* (Ledermann et al. 2014). Closely related viruses of the *Flaviviridae* family are vectored by over nine mosquito species, on average (see Supplementary Data). Thus, because Zika virus may be associated with multiple mosquito species, we considered it necessary to develop a more comprehensive list of potential Zika vectors.

The gold standard for identifying competent disease vectors requires isolating virus from field-collected mosquitoes, followed by experimental inoculation and laboratory investigation of viral dissemination throughout the body and to the salivary glands (Barnett 1960, Hardy et al. 1983), and, when possible, successful transmission back to the vertebrate host (e.g. (Komar et al. 2003)). Unfortunately, these methods are costly, often underestimate the risk of transmission (Bustamante and Lord 2010), and the amount of time required for analyses can delay decision making during an outbreak (Day 2001). To address the problem of identifying potential vector candidates in an actionable time frame, we therefore pursued a data-driven approach to identifying candidate vectors aided by machine learning algorithms for identifying patterns in high dimensional data. If the propensity of mosquito species to associate with Zika virus is statistically associated with common mosquito traits, it is possible to rank mosquito species by the degree of risk represented by their traits – a comparative approach similar to the analysis of risk factors in epidemiology. For instance, a model could be constructed to estimate the statistical discrepancy between the traits of known vectors (i.e., *Ae. aegypti*, *Ae. albopictus*, and *Ae. hensilli*) and the traits of all possible vectors. Unfortunately, this simplistic approach would inevitably fail due to the small amount of available data (i.e., sample size of 3). Thus, we developed an indirect approach that leverages information contained in the associations among many virus-mosquito pairs to inform us about specific associations. Specifically, our method identifies covariates associated with the propensity for mosquito species to vector any flavivirus. From this, we constructed a model of the mosquito-flavivirus network and then extracted from this model the life history profile and species list of mosquitoes predicted to associate with Zika virus, which we recommend be experimentally

68 tested for Zika virus competence.

## 69 **Methods**

### 70 **Data Collection and Feature Construction**

71 Our dataset comprised a matrix of vector-virus pairs relating all known flaviviruses and their  
 72 mosquito vectors. To construct this matrix, we first compiled a list of mosquito-borne flaviviruses  
 73 to include in our study (Van Regenmortel et al. 2000, Kuno et al. 1998, Cook and Holmes 2005).  
 74 Viruses that only infect mosquitoes and are not known to infect humans were not included. Using  
 75 this list, we constructed a mosquito-virus pair matrix based on the Global Infectious Diseases  
 76 and Epidemiology Network database (GIDEON 2016), the International Catalog of Arboviruses  
 77 Including Certain Other Viruses of Vertebrates (ArboCat) (Karabatsos 1985), *The Encyclopedia*  
 78 *of Medical and Veterinary Entomology* (Russell et al. 2013) and Mackenzie et al. (2012).

79 We defined a known vector-virus pair as one for which the full transmission cycle (i.e, infection  
 80 of mosquito via an infected host (mammal or avian) or bloodmeal that is able to be transmitted  
 81 via saliva) has been observed. Basing vector competence on isolation or intrathoracic injection  
 82 bypasses several important barriers to transmission (Hardy et al. 1983), and may not be true  
 83 evidence of a mosquito’s ability to transmit an arbovirus. We found our definition to be more con-  
 84 servative than that which is commonly used in disease databases (e.g. Global Infectious Diseases  
 85 and Epidemiology Network database), which often assumes isolation from wild-caught mosquitoes  
 86 to be evidence of a mosquito’s role as vector. Therefore, a supplementary analysis investigates the  
 87 robustness of our findings with regards to uncertainty in vector status by comparing the analysis  
 88 reported in the main text to a second analysis in which any kind of evidence for association, in-  
 89 cluding merely isolating the virus in wild-caught mosquitoes, is taken as a basis for connection in  
 90 the virus-vector network (see Appendix I for analysis and results).

91 Fifteen mosquito traits (Appendix II, Table 1) and twelve virus traits (Appendix II, Table 2)  
 92 were collected from the literature. For the mosquito species, the geographic range was defined as  
 93 the number of countries in which the species has been collected, based on Walter Reed Biosys-

tematics Unit (2016). While there are uncertainties in species' ranges due to false absences, this represents the most comprehensive, standardized dataset available that includes both rare and common mosquito species. A species' continental extent was recorded as a binary value of its presence by continent. A species' host range was defined as the number of taxonomic classes the species is known to feed on, with the Mammalia class further split into non-human primates and other mammals, because of the important role primates play in zoonotic spillovers of vector-borne disease (e.g. dengue, chikungunya, yellow fever, and Zika viruses) (Weaver 2005, Diallo et al. 2005a, Weaver et al. 2016). The total number of unique flaviviruses observed per mosquito species was calculated from our mosquito-flavivirus matrix. All other traits were based on consensus in the literature (see Appendix III for sources by species). For three traits – urban preference, endophily (a proclivity to bite indoors), and salinity tolerance – if evidence of that trait for a mosquito was not found in the literature, it was assumed to be negative.

We collected data on the following virus traits: host range (Mahy 2009, Mackenzie et al. 2012, Chambers and Monath 2003, Cook and Zumla 2009), disease severity (Mackenzie et al. 2012), human illness (Chambers and Monath 2003, Cook and Zumla 2009), presence of a mutated envelope protein, which controls viral entry into cells (Grard et al. 2009), year of isolation (Karabatsos 1985), and host range (Karabatsos 1985). Disease severity was based on Mackenzie et al. (2012), ranging from no known symptoms (e.g. Kunjin virus) to severe symptoms and significant human mortality (e.g. yellow fever virus). For each virus, vector range was calculated as the number of mosquito species for which the full transmission cycle has been observed. Genome length was calculated as the mean of all complete genome sequences listed for each flavivirus in the Virus Pathogen Database and Analysis Resource (<http://www.viprbrc.org/>). For more recently discovered flaviviruses not yet cataloged in the above databases (i.e., New Mapoon Virus, Iquape virus), viral traits were gathered from primary literature (sources listed in Appendix III).

## **Predictive model**

Following Han et al. (2015), boosted regression trees (BRT) (Friedman 2001) were used to fit a logistic-like predictive model relating the status of all possible virus-vector pairs (0: not associated,

1: associated) to a predictor matrix comprising the traits of the mosquito and virus traits in each pair. Boosted regression trees circumvent many issues associated with traditional regression analysis (Elith et al. 2008), allowing for complex variable interactions, collinearity, non-linear relationships between covariates and response variables, and missing data. Additionally, this technique performs well in comparison with other logistic regression approaches (Friedman 2001). Trained boosted regression tree models are dependent on the split between training and testing data, such that each model might predict slightly different propensity values. To address this, we trained an ensemble of 25 internally cross-validated BRT models on independent partitions of training and testing data. The resulting model demonstrated low variance in relative variable importance and overall model accuracy, suggesting models all converged to a similar result.

Prior to the analysis of each model, we randomly split the data into training (70%) and test (30%) sets while preserving the proportion of positive labels (known associations) in each of the training and test sets. Models were trained using the `gbm` package in *R* (Ridgeway 2015), with the maximum number of trees set to 25,000, a learning rate of 0.001, and an interaction depth of 5. To correct for optimistic bias (Smith et al. 2014), we performed 10-fold cross validation and chose a bag fraction of 50% of the training data for each iteration of the model. We estimated the performance of each individual model with three metrics: Area Under the Receiver Operator Curve, specificity, and sensitivity. For specificity and sensitivity, which require a preset threshold, we thresholded predictions on the testing data based on the value which maximized the sum of the sensitivity and specificity, a threshold robust to the ratio of presence to background points in presence-only datasets (Liu et al. 2015). Variable importance was quantified by permutation (Breiman 2001) to assess the relative contribution of virus and vector traits to the propensity for a virus and vector to form a pair. Because we transformed many categorical variables into binary variables (e.g., continental range as binary presence or absence by continent), the sum of the relative importance for each binary feature was summed to obtain a single value for the entire variable.

Each of our twenty-five trained models was then used to predict novel mosquito vectors of Zika by applying the trained model to a data set consisting of the virus traits of Zika paired with the

149 traits of all mosquitoes for which flaviviruses have been isolated from wild caught individuals, and,  
150 depending on the species, may or may not have been tested in full transmission cycle experiments  
151 (a total of 180 mosquito species). This expanded dataset allowed us to predict over a large  
152 number of mosquito species, while reasonably limiting our dataset to those species suspected of  
153 transmitting flaviviruses. The output of this model was a propensity score ranging from 0 to 1.  
154 In our case, the final propensity score for each vector was the mean propensity score assigned by  
155 the twenty-five models. To label unobserved edges, we thresholded propensity scores at the value  
156 of lowest ranked known vector (Liu et al. 2013).

## 157 **Model Validation**

158 In addition to conventional performance metrics, we conducted additional analyses to further  
159 validate both this method of prediction, and our model specifically. To account for uncertainty  
160 in the vector-virus links in our initial matrix, we repeated our analysis for a vector-virus matrix  
161 with a less conservative definition of a positive link (field isolation and above), referred to as  
162 our supplementary model. Vector competence is a dynamic trait, and there exists significant  
163 intraspecific variation in the ability of a vector to transmit a virus for certain species of mosquitoes  
164 (Diallo et al. 2005b, Gubler et al. 1979). Our supplementary model is based on a less conservative  
165 definition of vector competence and includes species implicated as vectors, but not yet verified  
166 through laboratory competence studies, and therefore accounts for additional uncertainty such as  
167 intraspecific variation.

168 While this approach is well-tested in epidemiological applications (Parascandola 2004), it has  
169 only recently been applied to predict ecological associations, and, as such, has limitations unique to  
170 this application. To further evaluate this prediction method, we performed a modified “leave-one-  
171 out” analysis, whereby we trained a model to a dataset from which a well-studied virus had been  
172 omitted, and then predicted vectors for this virus and compared them against a list of known  
173 vectors. We repeated this analysis for West Nile, dengue, and yellow fever viruses, following the  
174 same method of training as for our original model. While this analysis differs from our original  
175 method, it provides a more stringent evaluation of this method of prediction because the model is



trained on an incomplete dataset and predicts on unfamiliar data, a more difficult task than that posed to our original model.

# Results

In total, we identified 132 vector-virus pairs, consisting of 77 mosquito species and 37 flaviviruses. The majority of these species were *Aedes* (32) or *Culex* (24) species. Our supplementary dataset consisted of an additional 103 mosquito species suspected to transmit flaviviruses, but for which evidence of a full transmission cycle does not exist. This resulted in 180 potential mosquito-Zika pairs on which to predict with our trained model. As expected, closely related viruses, such as the four strains of dengue, shared many of the same vectors and were clustered in our network diagram (Fig. 1). The distribution of vectors to viruses was uneven, with a few viruses vectored by many mosquito species, and rarer viruses vectored by only one or two species. The virus with the most known competent vectors was West Nile virus (31 mosquito vectors), followed by yellow fever virus (24 mosquito vectors). In general, encephalitic viruses such as West Nile virus were found to be more commonly vectored by *Culex* mosquitoes and hemorrhagic viruses were found to be more commonly vectored by *Aedes* mosquitoes (see Gould and Solomon (2008) for further distinctions within *Flaviviridae*) (Fig. 1).

Our ensemble of BRT models trained on common vector and virus traits predicted mosquito vector-virus pairs in the test dataset with high accuracy ( $AUC = 0.92 \pm 0.02$ ;  $sensitivity = 0.858 \pm 0.04$ ;  $specificity = 0.872 \pm 0.04$ ). Due to non-monotonicity and existence of interactions among predictor variables within our model, one cannot make general statements about the directionality of effect. Thus, we focus on the relative importance of different variables to model performance. The most important variable for accurately predicting the presence of vector-virus pair was the subgenus of the mosquito species, followed by continental range (e.g. continents on which species are present). The number of viruses vectored by a mosquito species and number of mosquito vectors of a virus were the third and fifth most important variables, respectively. Unsurprisingly, this suggests that, when controlling for other variables, mosquitoes and viruses with more known vector-virus pairs (i.e., more viruses vectored and more hosts infected, respectively), are more



likely to be part of a predicted pair by the model. Mosquito ecological traits such as larval habitat and salinity tolerance were generally less important than a species' phylogeny or geographic range (Figure 2).

When applied to the 180 potential mosquito-Zika pairs, the model predicted thirty-five vectors to be ranked above the threshold (set at the value of the lowest-ranked known vector), for a total of nine known vectors and twenty-six novel, predicted mosquito vectors of Zika (Table 1). Of these vectors, there were twenty-four *Aedes* species, nine *Culex* species, one *Psorophora* species, and one *Runchomyia* species. The GBM model's top two ranked vectors for Zika are the most highly-suspected vectors of Zika virus, *Ae. aegypti* and *Ae. albopictus*.

## Model Validation

Our supplementary and primary models generally concur and their ranking of potential Zika virus vectors are highly correlated ( $\rho = 0.508$  and  $\rho = 0.693$  on raw and thresholded predictions, respectively). As one might expect, the supplementary model assigned fewer scores of low propensity (App. 1, Fig. 2), suggesting that incorporating this additional uncertainty in the training dataset eroded the models ability to distinguish negative links. The supplementary model's performance on the testing data ( $AUC = 0.84 \pm 0.02$ ), however, indicates that the additional uncertainty did not impede model performance.

When trained on "leave-one-out" datasets, all three models were able to predict the testing data with high accuracy ( $AUC = 0.91$ ,  $AUC = 0.91$ ,  $AUC = 0.92$  for West Nile, dengue, and yellow fever viruses, respectively). Performance varied when models were validated against predictions of "known outcomes". A model trained without West Nile virus predicted highly linked vectors reasonably well ( $AUC = 0.69$ ), however it assigned low scores to rarer "known" vectors, such as *Culiseta inornata*, which was only associated with West Nile virus. Similarly, the model trained on the dengue-omitted dataset predicted training data and vectors of dengue itself with high accuracy ( $AUC = 0.92$ ). While the model trained without yellow fever performed well on the testing data, it performed poorly when predicting vectors of yellow fever virus ( $AUC = 0.47$ ). Unlike West Nile and dengue viruses, the majority of the known vectors of yellow fever are only

associated with yellow fever (i.e. a single vector-virus link), and so were excluded completely from the training data when all yellow fever links were omitted. Additionally, several of the vectors species are of the *Haemagogus* genus, which was completely absent from the training data. Given the importance of phylogeny of the vector species in predicting vector-virus links, it follows that a dataset with a novel subgenus would be difficult for the model to predict on, resulting in low model performance. The low performance of this model illustrates that incorporating common traits and additional vector-virus links improves model prediction. When traits were not available in the training dataset, model performance was much lower, suggesting that there exists a statistical association between a vectors' traits and its ability to transmit a virus.

## Discussion

Zika virus is unprecedented among emerging arboviruses in its combination of severe public health hazard, rapid spread, and poor scientific understanding. Particularly crucial to public health preparedness is knowledge about the geographic extent of potentially at risk populations and local environmental conditions for transmission, which are determined by the presence of competent vectors. Until now, identifying additional competent vector species has been a low priority because Zika virus has historically been geographically restricted to a narrow region of equatorial Africa and Asia (Petersen et al. 2016), and the mild symptoms of infection made its range expansion since the 1950's relatively unremarkable. However, with its relatively recent and rapid expansion into the Americas and its association with severe neurological disorders, the prediction of potential disease vectors in non-endemic areas has become a matter of critical public health importance. We identify these potential vector species by developing a data-driven model that identifies candidate vector species of Zika virus by leveraging data on traits of mosquito vectors and their flaviviruses. We suggest that empirical work should prioritize these species in their evaluation of vector competence of mosquitoes for Zika virus.

Our model predicts that fewer than one third of the potential mosquito vectors of Zika virus have been identified, with over twenty-five additional mosquito species worldwide that may have the capacity to contribute to transmission. The continuing focus in the published literature on

two species known to transmit Zika virus (*Ae. aegypti* and *Ae. albopictus*) ignores the potential role of other vectors, potentially misrepresenting the spatial extent of risk. In particular, four species predicted by our model to be competent vectors – *Ae. vexans*, *Culex quinquefasciatus*, *Cx. pipiens*, and *Cx. tarsalis* – are found throughout the continental United States. Further, the three *Culex* species are primary vectors of West Nile virus (Farajollahi et al. 2011). *Cx. quinquefasciatus* and *Cx. pipiens* were ranked 3rd and 17th by our model, respectively, and together these species were the highest-ranking species endemic to the United States after the known vectors (*Ae. aegypti* and *Ae. albopictus*). *Cx. quinquefasciatus* has previously been implicated as an important vector of encephalitic flaviviruses, specifically West Nile virus and St. Louis encephalitis (Turell et al. 2005, Hayes et al. 2005), and a hybridization of the species with *Cx. pipiens* readily bites humans (Fonseca et al. 2004). The empirical data available on the vector competence of *Cx. pipiens* and *Cx. quinquefasciatus* is currently mixed, with some studies finding evidence for virus transmission and others not (Guo et al. 2016, Aliota et al. 2016, Fernandes et al. 2016, Huang et al. 2016). These results suggest, in combination with evidence for significant genotype  $\times$  genotype effects on the vector competence of *Ae. aegypti* and *Ae. albopictus* to transmit Zika (Chouin-Carneiro et al. 2016), that the vector competence of *Cx. pipiens* and *Cx. quinquefasciatus* for Zika virus could be highly dependent upon the genetic background of the mosquito-virus pairing, as well as local environmental conditions. Thus, considering their anthropophilic natures and wide geographic ranges, *Cx. quinquefasciatus* and *Cx. pipiens* could potentially play a larger role in the transmission of Zika in the continental United States. Further experimental research into the competence of populations of *Cx. pipiens* to transmit Zika virus across a wider geographic range is therefore highly recommended, and should be prioritized.

The vectors predicted by our model have a combined geographic range much larger than that of the currently suspected vectors of Zika (Fig. 3), suggesting that, were these species to be confirmed as vectors, a larger population may be at risk of Zika infection than depicted by maps focusing solely on *Ae. aegypti* and *Ae. albopictus*. The range of *Cx. pipiens* includes the Pacific Northwest and the upper mid-West, areas that are not within the known range of *Ae. aegypti* or *Ae. albopictus* (Darsie and Ward 2005). Furthermore, *Ae. vexans*, another predicted vector of

285 Zika virus, is found throughout the continental US and the range of *Cx. tarsalis* extends along the  
 286 entire West coast (Darsie and Ward 2005). On a finer scale, these species use a more diverse set of  
 287 habitats, with *Ae. aegypti* and *Cx. quinquefasciatus* mainly breeding in artificial containers, and  
 288 *Ae. vexans* and *Ae. albopictus* being relatively indiscriminate in their breeding sites, including  
 289 breeding in natural sites such as tree holes and swamps. Therefore, in addition to the wider  
 290 geographic region supporting potential vectors, these findings suggest that both rural and urban  
 291 areas could serve as habitat for potential vectors of Zika. We recommend experimental tests of  
 292 these species for competency to transmit Zika virus, because a confirmation of these vectors would  
 293 necessitate expanding public health efforts into these areas not currently considered at risk.

294 While transmission requires a competent vector, vector competence does not necessarily equal  
 295 transmission risk or inform vectorial capacity. There are many biological factors that, in con-  
 296 junction with positive vector competence, determine a vector's role in disease transmission. For  
 297 example, although *Ae. aegypti* mosquitoes are efficient vectors of West Nile virus, they prefer to  
 298 feed on humans, which are dead-head hosts for the disease, and therefore have low potential to  
 299 serve as a vector (Turell et al. 2005). *Psorophora ferox*, although predicted by our model as a  
 300 potential vector of Zika virus, would likely play a limited role in transmission because it rarely  
 301 feeds on humans (Molaei et al. 2008). Additionally, vector competence is dynamic, and may be  
 302 mediated by environmental factors that influence viral development and mosquito immunity (Mu-  
 303 turi and Alto 2011). Therefore, our list of potential vectors of Zika represents a comprehensive  
 304 starting point, which should be furthered narrowed by empirical work and consideration of biolog-  
 305 ical details that impact transmission dynamics. Given the severe neurological side-effects of Zika  
 306 virus infection, beginning with the most conservative method of vector prediction ensures that  
 307 risk is not underestimated, and allows public health agencies to interpret the possibility of Zika  
 308 transmission given local conditions.

309 Our model serves as a starting point to streamlining empirical efforts to identify areas and  
 310 populations at risk for Zika transmission. While our model enables data-driven predictions about  
 311 the geographic area at potential risk of Zika transmission, subsequent empirical work investigating  
 312 Zika vector competence and transmission efficiency is required for model validation, and to inform

313 future analyses of transmission dynamics. For example, in spite of its low transmission efficiency  
 314 in certain geographic regions (Chouin-Carneiro et al. 2016), *Ae. aegypti* is anthropophilic (Powell  
 315 et al. 2013), and may therefore pose a greater risk of human-to-human Zika virus transmission than  
 316 mosquitoes that bite a wider variety of animals. On the other hand, mosquito species that prefer  
 317 certain hosts in rural environments are known to alter their feeding behaviors to bite alternative  
 318 hosts (e.g., humans and rodents) in urban settings, due to changes in host community composi-  
 319 tion (Chaves et al. 2010). Environmental factors such as precipitation and temperature directly  
 320 influence mosquito populations, and determine the density of vectors in a given area (Thomson  
 321 et al. 2006), an important factor in transmission risk. Additionally, socio-economic factors such as  
 322 housing type and lifestyle can decrease a populations' contact with mosquito vectors, and lower  
 323 the risk of transmission to humans (Moreno-Madriñán and Turell 2017). Effective risk modeling  
 324 and forecasting the range expansion of Zika virus in the United States will depend on validating  
 325 the vector status of these species, as well as resolving behavioral and biological details that impact  
 326 transmission dynamics.

327 Although we developed this model with Zika virus in mind, our findings have implications for  
 328 other emerging flaviviruses and contribute to recently developed methodology applying machine  
 329 learning methods to the prediction of unknown agents of infectious diseases. This technique has  
 330 been used to predict rodent reservoirs of disease (Han et al. 2015) and bat carriers of filoviruses  
 331 (Han et al. 2016) by training models with host-specific data. Our model, however, incorporates  
 332 additional data by constructing a vector-virus network that is used to inform predictions of vector-  
 333 virus associations. The combination of common virus traits with vector-specific traits enabled us  
 334 to predict potential mosquito vectors of specific flaviviruses, and to train the model on additional  
 335 information distributed throughout the the flavivirus-mosquito network.

336 Uncertainty in our model arises through uncertainty inherent in our datasets. Vector status  
 337 is not static (e.g. mutation in the chikungunya virus to increase transmission by *Ae. albopictus*  
 338 (Weaver and Forrester 2015)) and can vary across vector populations (Bennett et al. 2002). When  
 339 incorporating uncertainty in vector status through our supplementary model, our predictions gen-  
 340 erally agreed with that of our original model. However, the increased uncertainty did reduce the

models' ability to distinguish negative links, resulting in higher uncertainty in propensities scores (as measured by standard deviation) and a larger number of predicted vectors. Additionally, the model performs poorly when predicting on vector-virus links with trait levels not included in the training data set, as was the case when omitting yellow fever virus. Another source of uncertainty is regarding vector and virus traits. In addition to intraspecific variation in biological traits, many vectors are understudied, and common traits such as biting activity are unknown to the level of species. Additional study into the behavior and biology of less common vector species would increase the accuracy of prediction techniques such as this, and allow for a better understanding of species' potential role as vectors.

Interestingly, our constructed flavivirus-mosquito network generally concurs with the proposed dichotomy of *Aedes* species vectoring hemorrhagic or febrile arboviruses and *Culex* species vectoring neurological or encephalitic viruses (Grard et al. 2009) (Fig. 1). However, there are several exceptions to this trend, notably West Nile virus, which is vectored by several *Aedes* species. Additionally, our model predicts several *Culex* species to be possible vectors of Zika virus. While this may initially seem contrary to the common phylogenetic pairing of vectors and viruses noted above, Zika's symptoms, like West Nile virus, are both febrile and neurological. Thus, its symptoms do not follow the conventional hemorrhagic/encephalitic division. The ability of Zika virus to be vectored by a diversity of mosquito vectors could have important public health consequences, as it may expand both the geographic range and seasonal transmission risk of Zika virus, and warrants further empirical investigation.

Considering our predictions of potential vector species and their combined ranges, species on the candidate vector list need to be validated to inform the response to Zika virus. Vector control efforts that target *Aedes* species exclusively may ultimately be unsuccessful in controlling transmission of Zika because they do not control other, unknown vectors. For example, the release of genetically modified *Ae. aegypti* to control vector density through sterile insect technique is species-specific and would not control alternative vectors (Alphey et al. 2009). Additionally, species' habitat preferences differ, and control efforts based singularly on reducing *Aedes* larval habitat will not be as successful at controlling *Cx. quinquefasciatus* populations (Rey et al. 2006).

369 Predicted vectors of Zika virus must be empirically tested and, if confirmed, vector control efforts  
 370 would need to respond by widening their focus to control the abundance of all predicted vectors  
 371 of Zika virus. Similarly, if control efforts are to include all areas at potential risk of disease  
 372 transmission, public health efforts would need to expand to address regions such as the northern  
 373 Midwest that fall within the range of the additional vector species predicted by our model. An  
 374 understanding of the capacity of mosquito species to vector Zika virus is necessary to prepare for  
 375 potential establishment of Zika virus in the United States, and we recommend that experimental  
 376 work start with this list of candidate vector species.

## 377 **Acknowledgements**

378 The authors acknowledge Pasha Feinberg for assistance with data collection.



# References

- Aliota, M. T., S. A. Peinado, J. E. Osorio, and L. C. Bartholomay. 2016. *Culex pipiens* and *Aedes triseriatus* mosquito susceptibility to Zika virus [letter]. *Emerging Infectious Diseases* .
- Alphey, L., M. Benedict, R. Bellini, G. G. Clark, D. A. Dame, M. W. Service, and S. L. Dobson. 2009. Sterile-Insect Methods for Control of Mosquito-Borne Diseases: An Analysis. *Vector-Borne and Zoonotic Diseases* **10**:295–311.
- Barnett, H., 1960. The Incrimination of Arthropods as Vectors of Disease. Pages 341–345 in *Proceedings of the 11th International Congress of Entomology*, volume 1962. Strouhal H, Beier M, editors.
- Bennett, K. E., K. E. Olson, M. d. L. Muñoz, I. Fernandez-Salas, J. A. Farfan-Ale, S. Higgs, W. C. Black, and B. J. Beaty. 2002. Variation in Vector Competence for Dengue 2 Virus among 24 Collections of *Aedes Aegypti* from Mexico and the United States. *Am J Trop Med Hyg* **67**:85–92.
- Boorman, J. P. T., and J. S. Porterfield. 1956. A simple technique for infection of mosquitoes with viruses transmission of Zika virus. *Transactions of The Royal Society of Tropical Medicine and Hygiene* **50**:238–242.
- Breiman, L. 2001. Random Forests. *Machine learning* **45**:5–32.
- Bustamante, D. M., and C. C. Lord. 2010. Sources of Error in the Estimation of Mosquito Infection Rates Used to Assess Risk of Arbovirus Transmission. *American Journal of Tropical Medicine and Hygiene* **82**:1172–1184.
- Cao-Lormeau, V.-M., A. Blake, S. Mons, S. L. Lastère, C. R. Roche, J. Vanhomwegen, T. Dub, L. Baudouin, A. Teissier, P. Larre, A.-L. Vial, C. Decam, V. Choumet, S. K Halstead, H. J. Willison, L. Musset, J.-C. Manuguerra, P. Despres, E. Fournier, H.-P. Mallet, D. Musso, A. Fontanet, J. Neil, and F. Ghawché. 2016. Guillain-Barré Syndrome outbreak associated with Zika virus infection in French Polynesia: a case-control study. *The Lancet* **387**:1–9.

Centers for Disease Control and Prevention, 2016. Estimated range of *Aedes albopictus* and *Aedes aegypti* in the United States, 2016. <http://www.cdc.gov/zika/vector/range.html>.

Chambers, T. J., and T. P. Monath, editors. 2003. The Flaviviruses: Detection, Diagnosis and Vaccine Development. Academic Press.

Chaves, L. F., L. C. Harrington, C. L. Keogh, A. M. Nguyen, and U. D. Kitron. 2010. Blood feeding patterns of mosquitoes: random or structured? *Frontiers in Zoology* **7**:3–11.

Chouin-Carneiro, T., A. Vega-Rua, M. Vazeille, A. Yebakima, R. Girod, D. Goindin, M. Dupont-Rouzeyrol, R. Lourenço-de Oliveira, and A.-B. Failloux. 2016. Differential Susceptibilities of *Aedes aegypti* and *Aedes albopictus* from the Americas to Zika Virus. *PLoS Neglected Tropical Diseases* **10**:e0004543–11.

Cook, G. C., and A. Zumla. 2009. *Manson's Tropical Diseases*. Elsevier Health Sciences.

Cook, S., and E. C. Holmes. 2005. A multigene analysis of the phylogenetic relationships among the flaviviruses (Family: Flaviviridae) and the evolution of vector transmission. *Archives of Virology* **151**:309–325.

Darsie, R. F., and R. A. Ward. 2005. *Identification and Geographical Distribution of the Mosquitos of North America, North of Mexico*. University Press of Florida.

Day, J. F. 2001. Predicting St. Louis Encephalitis Virus Epidemics: Lesson from Recent, and Not So Recent, Outbreaks. *Annual Review of Entomology* **46**:111–138.

Diagne, C. T., D. Diallo, O. Faye, Y. Ba, O. Faye, A. Gaye, I. Dia, S. C. Weaver, A. A. Sall, and M. Diallo. 2015. Potential of selected Senegalese *Aedes* spp. mosquitoes (Diptera: Culicidae) to transmit Zika virus. *BMC Infectious Diseases* **15**.

Diallo, M., A. A. Sall, A. C. Moncayo, Y. Ba, Z. Fernandez, D. Ortiz, L. L. Coffey, C. Mathiot, R. B. Tesh, and S. C. Weaver. 2005a. Potential role of sylvatic and domestic African mosquito species in dengue emergence. *American Journal of Tropical Medicine and Hygiene* **73**:445–449.

428 Diallo, M., A. A. Sall, A. C. Moncayo, Y. Ba, Z. Fernandez, D. Ortiz, L. L. Coffey, C. Mathiot,  
429 R. B. Tesh, and S. C. Weaver. 2005*b*. Potential Role of Sylvatic and Domestic African Mosquito  
430 Species in Dengue Emergence. *American Journal of Tropical Medicine and Hygiene* **73**:445–449.

431 Duffy, M. R., T.-H. Chen, W. T. Hancock, A. M. Powers, J. L. Kool, R. S. Lanciotti, M. Pretrick,  
432 M. Marfel, S. Holzbauer, C. Dubray, L. Guillaumot, A. Griggs, M. Bel, A. J. Lambert, J. Laven,  
433 O. Kosoy, A. Panella, B. J. Biggerstaff, M. Fischer, and E. B. Hayes. 2009. Zika virus outbreak  
434 on Yap Island, federated states of Micronesia. *New England Journal of Medicine* **360**:2536–2543.

435 Elith, J., J. R. Leathwick, and T. Hastie. 2008. A working guide to boosted regression trees.  
436 *Journal of Animal Ecology* **77**:802–813.

437 Farajollahi, A., D. M. Fonseca, L. D. Kramer, and A. M. Kilpatrick. 2011. “Bird biting” mosquitoes  
438 and human disease: A review of the role of *Culex pipiens* complex mosquitoes in epidemiology.  
439 *Infection, Genetics and Evolution* **11**:1577–1585.

440 Faria, N. R., R. d. S. d. S. Azevedo, M. U. G. Kraemer, R. Souza, M. S. Cunha, S. C. Hill,  
441 J. Theze, M. B. Bonsall, T. A. Bowden, I. Rissanen, I. M. Rocco, J. S. Nogueira, A. Y. Maeda,  
442 F. G. d. S. Vasami, F. L. d. L. Macedo, A. Suzuki, S. G. Rodrigues, A. C. R. Cruz, B. T.  
443 Nunes, D. B. d. A. Medeiros, D. S. G. Rodrigues, A. L. Nunes Queiroz, E. V. P. d. Silva,  
444 D. F. Henriques, E. S. Travassos da Rosa, C. S. de Oliveira, L. C. Martins, H. B. Vasconcelos,  
445 L. M. N. Casseb, D. d. B. Simith, J. P. Messina, L. Abade, J. Lourenco, L. C. J. Alcantara,  
446 M. M. d. Lima, M. Giovanetti, S. I. Hay, R. S. de Oliveira, P. d. S. Lemos, L. F. d. Oliveira,  
447 C. P. S. de Lima, S. P. da Silva, J. M. d. Vasconcelos, L. Franco, J. F. Cardoso, J. L. d. S. G.  
448 Vianez-Junior, D. Mir, G. Bello, E. Delatorre, K. Khan, M. Creatore, G. E. Coelho, W. K.  
449 de Oliveira, R. Tesh, O. G. Pybus, M. R. T. Nunes, and P. F. C. Vasconcelos. 2016. Zika virus  
450 in the Americas: Early epidemiological and genetic findings. *Science* **352**:345–349.

451 Fernandes, R. S., S. S. Campos, A. Ferreira-de Brito, R. M. d. Miranda, K. A. B. d. Silva, M. G. d.  
452 Castro, L. M. S. Raphael, P. Brasil, A.-B. Failloux, M. C. Bonaldo, and R. Loureno-de Oliveira.  
453 2016. *Culex quinquefasciatus* from Rio de Janeiro Is Not Competent to Transmit the Local Zika  
454 Virus. *PLOS Negl Trop Dis* **10**:e0004993.

455 Fonseca, D. M., N. Keyghobadi, C. A. Malcolm, C. Mehmet, F. Schaffner, M. Mogi, R. C. Fleischer,  
456 and R. C. Wilkerson. 2004. Emerging Vectors in the *Culex pipiens* Complex. *Science* **303**:1535–  
457 1538.

458 Friedman, J. H. 2001. Greedy Function Approximation: A Gradient Boosting Machine. *The*  
459 *Annals of Statistics* **29**:1189–1232.

460 GIDEON, 2016. Global Infectious Diseases and Epidemiology Network.

461 Gould, E. A., and T. Solomon. 2008. Pathogenic flaviviruses. *The Lancet* **371**:500–509.

462 Grard, G., G. Moureau, R. N. Charrel, E. C. Holmes, E. A. Gould, and X. de Lamballerie. 2009.  
463 Genomics and evolution of Aedes-borne flaviviruses. *Journal of General Virology* **91**:87–94.

464 Gubler, D. J., S. Nalim, R. Tan, H. Saipan, and J. Sulianti Saroso. 1979. Variation in Suscepti-  
465 bility to Oral Infection with Dengue Viruses among Geographic Strains of *Aedes Aegypti*. *The*  
466 *American Journal of Tropical Medicine and Hygiene* **28**:1045–1052.

467 Guo, X.-x., C.-x. Li, Y.-q. Deng, D. Xing, Q.-m. Liu, Q. Wu, A.-j. Sun, Y.-d. Dong, W.-c. Cao,  
468 C.-f. Qin, and T.-y. Zhao. 2016. *Culex pipiens quinquefasciatus*: a potential vector to transmit  
469 Zika virus. *Emerging Microbes & Infections* **5**:e102.

470 Haddow, A. D., A. J. Schuh, C. Y. Yasuda, M. R. Kasper, V. Heang, R. Huy, H. Guzman, R. B.  
471 Tesh, and S. C. Weaver. 2012. Genetic Characterization of Zika Virus Strains: Geographic  
472 Expansion of the Asian Lineage. *PLoS Neglected Tropical Diseases* **6**:e1477–7.

473 Haddow, A. J., M. C. Williams, J. P. Woodall, D. I. H. Simpson, and L. K. H. Goma. 1964.  
474 Twelve isolations of Zika virus from *Aedes (Stegomyia) africanus* (Theobald) taken in and above  
475 a Uganda forest. *Bulletin of the World Health Organization* **31**:57–69.

476 Han, B. A., J. P. Schmidt, L. W. Alexander, S. E. Bowden, D. T. S. Hayman, and J. M. Drake.  
477 2016. Undiscovered Bat Hosts of Filoviruses. *PLoS Neglected Tropical Diseases* **10**:e0004815–10.

478 Han, B. A., J. P. Schmidt, S. E. Bowden, and J. M. Drake. 2015. Rodent reservoirs of future  
479 zoonotic diseases. *Proceedings of the National Academy of Sciences* pages 1–6.

480 Hardy, J. L., E. J. Houk, L. D. Kramer, and W. C. Reeves. 1983. Intrinsic factors affecting vector  
481 competence of mosquitoes for arboviruses. *Annual Review of Entomology* **28**:229–262.

482 Hayes, E. B., N. Komar, R. S. Nasci, S. P. Montgomery, D. R. OLeary, and G. L. Campbell. 2005.  
483 Epidemiology and Transmission Dynamics of West Nile Virus Disease. *Emerging Infectious*  
484 *Diseases* **11**:1167–1173.

485 Huang, Y.-J. S., V. B. Ayers, A. C. Lyons, I. Unlu, B. W. Alto, L. W. Cohnstaedt, S. Higgs,  
486 and D. L. Vanlandingham. 2016. *Culex* Species Mosquitoes and Zika Virus. *Vector-Borne and*  
487 *Zoonotic Diseases* .

488 Karabatsos, N. 1985. International Catalog of Arboviruses Including Certain Other Viruses of  
489 Vertebrates. *The American Journal of Tropical Medicine and Hygiene* **27**:372–440.

490 Komar, N., S. Langevin, S. Hinten, N. Nemeth, E. Edwards, D. Hettler, B. Davis, R. Bowen, and  
491 M. Bunning. 2003. Experimental infection of north American birds with the New York 1999  
492 strain of West Nile virus. *Emerging Infectious Diseases* **9**:311–322.

493 Kuno, G., G.-J. J. Chang, K. R. Tsuchiya, N. Karabatsos, and C. B. Cropp. 1998. Phylogeny of  
494 the Genus *Flavivirus*. *Journal of Virology* **72**:73–83.

495 Ledermann, J. P., L. Guillaumot, L. Yug, S. C. Saweyog, M. Tided, P. Machieng, M. Pretrick,  
496 M. Marfel, A. Griggs, M. Bel, M. R. Duffy, W. T. Hancock, T. Ho-Chen, and A. M. Powers.  
497 2014. *Aedes hensilli* as a Potential Vector of Chikungunya and Zika Viruses. *PLoS Neglected*  
498 *Tropical Diseases* **8**:e3188–9.

499 Liu, C., G. Newell, and M. White. 2015. On the selection of thresholds for predicting species  
500 occurrence with presence-only data. *Ecology and Evolution* **6**:337–348.

501 Liu, C., M. White, and G. Newell. 2013. Selecting thresholds for the prediction of species occur-  
502 rence with presence-only data. *Journal of Biogeography* **40**:778–789.

503 Mackenzie, J., A. D. T. Barrett, and V. Deubel. 2012. Japanese Encephalitis and West Nile  
504 Viruses. Springer Science & Business Media.

505 Mahy, B. W. J. 2009. The Dictionary of Virology. Academic Press.

506 Messina, J. P., M. U. G. Kraemer, O. J. Brady, D. M. Pigott, and F. Shearer. 2016. Mapping  
507 global environmental suitability for Zika virus. eLife pages 1–22.

508 Molaei, G., T. G. Andreadis, P. M. Armstrong, and M. Diuk-Wasser. 2008. Host-Feeding Patterns  
509 of Potential Mosquito Vectors in Connecticut, USA: Molecular Analysis of Bloodmeals from 23  
510 Species of *Aedes*, *Anopheles*, *Culex*, *Coquillettidia*, *Psorophora*, and *Uranotaenia*. Journal of  
511 Medical Entomology **45**:1143–1151.

512 Moreno-Madriñán, M. J., and M. Turell. 2017. Factors of Concern Regarding Zika and Other  
513 *Aedes Aegypti*-Transmitted Viruses in the United States. J. Med. Entomol. page tjw212.

514 Muturi, E. J., and B. W. Alto. 2011. Larval Environmental Temperature and Insecticide Exposure  
515 Alter *Aedes aegypti* Competence for Arboviruses. Vector-Borne and Zoonotic Diseases **11**:1157–  
516 1163.

517 Parascandola, M. 2004. Skepticism, Statistical Methods, and the Cigarette: A Historical Analysis  
518 of a Methodological Debate. Perspect. Biol. Med. **47**:244–261.

519 Petersen, E., M. E. Wilson, S. Touch, B. McCloskey, P. Mwaba, M. Bates, O. Dar, F. Mattes,  
520 M. Kidd, G. Ippolito, E. I. Azhar, and A. Zumla. 2016. Unexpected and Rapid Spread of Zika  
521 Virus in The Americas - Implications for Public Health Preparedness for Mass Gatherings at  
522 the 2016 Brazil Olympic Games. International Journal of Infectious Diseases pages 1–5.

523 Powell, J. R., W. J. Tabachnick, J. R. Powell, and W. J. Tabachnick. 2013. History of domestication  
524 and spread of *Aedes aegypti* - A Review. Memorias do Instituto Oswaldo Cruz **108**:11–17.

525 Rey, J. R., N. Nishimura, B. Wagner, M. A. H. Braks, S. M. O’Connell, and L. P. Lounibos.  
526 2006. Habitat segregation of mosquito arbovirus vectors in south Florida. Journal of Medical  
527 Entomology **43**:1134–1141.

528 Ridgeway, G., 2015. gbm: Generalized Boosted Regression Models.

529 Russell, R. C., D. Otranto, and R. L. Wall. 2013. The Encyclopedia of Medical and Veterinary  
530 Entomology. CABI.

531 Schuler-Faccini, L., E. M. Ribeiro, I. M. L. Feitosa, D. D. G. Horovitz, D. P. Cavalcanti, A. Pessoa,  
532 M. J. R. Doriqui, J. I. Neri, J. M. d. P. Neto, H. Y. C. Wanderley, M. Cernach, A. S. El-  
533 Husny, M. V. S. Pone, C. L. C. Seroa, M. T. V. Sanseverino, and Brazilian Medical Genetics  
534 Society—Zika Embryopathy Task Force. 2016. Possible Association Between Zika Virus Infection  
535 and Microcephaly — Brazil, 2015. MMWR. Morbidity and Mortality Weekly Report **65**:1–4.

536 Smith, G. C. S., S. R. Seaman, A. M. Wood, P. Royston, and I. R. White. 2014. Correcting for  
537 Optimistic Prediction in Small Data Sets. American Journal of Epidemiology **180**:318–324.

538 Thomson, M. C., F. J. Doblas-Reyes, S. J. Mason, R. Hagedorn, S. J. Connor, T. Phindela, A. P.  
539 Morse, and T. N. Palmer. 2006. Malaria Early Warnings Based on Seasonal Climate Forecasts  
540 from Multi-Model Ensembles. Nature **439**:576–9.

541 Turell, M. J., D. J. Dohm, M. R. Sardelis, M. L. O’guinn, T. G. Andreadis, and J. A. Blow. 2005.  
542 An Update on the Potential of North American Mosquitoes (Diptera: Culicidae) to Transmit  
543 West Nile Virus. Journal of Medical Entomology **42**:57–62.

544 Turell, M. J., D. J. Dohm, M. R. Sardelis, M. L. OGuinn, T. G. Andreadis, and J. A. Blow. 2005.  
545 An Update on the Potential of North American Mosquitoes (Diptera: Culicidae) to Transmit  
546 West Nile Virus. Journal of Medical Entomology **42**:57–62.

547 Van Regenmortel, M. H. V., C. M. Fauquet, and D. H. L. Bishop. 2000. Virus taxonomy :  
548 classification and nomenclature of viruses : seventh report of the International Committee on  
549 Taxonomy of Viruses. San Diego : Academic Press, c2000.

550 Walter Reed Biosystematics Unit, W. D., Smithsonian Institution, 2016. Walter Reed Biosys-  
551 tematics Unit Systematic catalog of Culicidae. <http://www.mosquitocatalog.org/>. Accessed:  
552 2016-05-02.

553 Weaver, S. C., 2005. Host range, amplification and arboviral disease emergence. Pages 33–44 *in*



P. D. C. J. Peters and P. C. H. Calisher, editors. Infectious Diseases from Nature: Mechanisms of Viral Emergence and Persistence. Springer Vienna.

Weaver, S. C., F. Costa, M. A. Garcia-Blanco, A. I. Ko, G. S. Ribeiro, G. Saade, P.-Y. Shi, and N. Vasilakis. 2016. Zika virus: History, emergence, biology, and prospects for control. *Antiviral Research* **130**:69–80.

Weaver, S. C., and N. L. Forrester. 2015. Chikungunya: Evolutionary History and Recent Epidemic Spread. *Antiviral Res.* **120**:32–39.

Table 1: **Predicted vectors of Zika virus, as reported by our model.** Mosquito species endemic to the continental United States are bolded. A species is defined as a known vector of Zika virus if a full transmission cycle (see main text) has been observed.

| Species                              | GBM Prediction $\pm$ <i>SD</i> | Known Vector? |
|--------------------------------------|--------------------------------|---------------|
| <b><i>Aedes aegypti</i></b>          | $0.81 \pm 0.12$                | Yes           |
| <b><i>Ae. albopictus</i></b>         | $0.54 \pm 0.14$                | Yes           |
| <b><i>Culex quinquefasciatus</i></b> | $0.38 \pm 0.14$                | No            |
| <i>Ae. polynesiensis</i>             | $0.36 \pm 0.13$                | No            |
| <i>Ae. scutellaris</i>               | $0.33 \pm 0.13$                | No            |
| <i>Ae. africanus</i>                 | $0.32 \pm 0.11$                | No            |
| <i>Ae. furcifer</i>                  | $0.31 \pm 0.16$                | Yes           |
| <i>Ae. vittatus</i>                  | $0.30 \pm 0.20$                | Yes           |
| <i>Ae. taylori</i>                   | $0.30 \pm 0.16$                | Yes           |
| <i>Ae. luteocephalus</i>             | $0.25 \pm 0.12$                | Yes           |
| <i>Ae. tarsalis</i>                  | $0.18 \pm 0.11$                | Yes           |
| <i>Ae. metallicus</i>                | $0.16 \pm 0.08$                | No            |
| <i>Ae. minutus</i>                   | $0.16 \pm 0.09$                | No            |
| <i>Ae. opok</i>                      | $0.14 \pm 0.06$                | No            |
| <i>Ae. bromeliae</i>                 | $0.11 \pm 0.06$                | No            |
| <i>Ae. scapularis</i>                | $0.10 \pm 0.04$                | No            |
| <b><i>Cx. pipiens</i></b>            | $0.10 \pm 0.04$                | No            |
| <i>Ae. hensilli</i>                  | $0.10 \pm 0.06$                | Yes           |
| <i>Ae. vigilax</i>                   | $0.10 \pm 0.05$                | No            |
| <i>Cx. annulirostris</i>             | $0.08 \pm 0.03$                | No            |
| <b><i>Psorophora ferox</i></b>       | $0.08 \pm 0.05$                | No            |
| <i>Cx. rubinotus</i>                 | $0.08 \pm 0.07$                | No            |
| <b><i>Cx. tarsalis</i></b>           | $0.08 \pm 0.03$                | No            |
| <i>Ae. occidentalis</i>              | $0.08 \pm 0.05$                | No            |
| <i>Ae. flavicollis</i>               | $0.07 \pm 0.04$                | No            |
| <i>Ae. serratus</i>                  | $0.07 \pm 0.04$                | No            |
| <i>Cx. p. molestus</i>               | $0.07 \pm 0.04$                | No            |
| <b><i>Ae. vexans</i></b>             | $0.06 \pm 0.04$                | No            |
| <i>Cx. neavei</i>                    | $0.06 \pm 0.02$                | No            |
| <i>Runchomyia frontosa</i>           | $0.06 \pm 0.04$                | No            |
| <i>Ae. neoaffricanus</i>             | $0.06 \pm 0.03$                | No            |
| <i>Ae. chemulpoensis</i>             | $0.06 \pm 0.03$                | No            |
| <i>Cx. vishnui</i>                   | $0.05 \pm 0.01$                | No            |
| <i>Cx. tritaeniorhynchus</i>         | $0.05 \pm 0.01$                | No            |
| <i>Ae. fowleri</i>                   | $0.04 \pm 0.03$                | Yes           |

Figure 1: **A network diagram of mosquito vectors (circles) and their flavivirus pairs (rectangles).** The *Culex* mosquitoes (light blue) and primarily encephalitic viruses (blue) are more clustered than the *Aedes* (orange) and hemorrhagic viruses (red). Notably, West Nile Virus is vectored by both *Aedes* and *Culex* species. Predicted vectors of Zika are shown by bolded links in black. The inset shows predicted vectors of Zika and species names, ordered by the model's propensity scores. Included flaviviruses are Banzi virus (BANV), Bouboui virus (BOUV), dengue virus strains 1, 2, 3 & 4 (DENV-1,2,3,4), Edge Hill virus (EHV), Ilheus virus (ILHV), Israel turkey meningoencephalomyelitis virus (ITV), Japanese encephalitis virus (JEV), Kedougou virus (KEDV), Kokobera virus (KOKV), Kunjin virus (KUNV), Murray Valley encephalitis virus (MVEV), Rocio virus (ROCV), St. Louis encephalitis virus (SLEV), Spondwendi virus (SPOV), Stratford virus (STRV), Uganda S virus (UGSV), Wesselsbron virus (WESSV), West Nile Virus (WNV), yellow fever virus (YFV), and Zika virus (ZIKV).

Figure 2: **Variable importance by permutation, averaged over 25 models.** Because some categorical variables were treated as binary by our model (i.e. continental range), the relative importance of each binary variable was summed to result in the overall importance of the categorical variable. Mosquito and virus traits are shown in blue and maroon, respectively. Error bars represent the standard error from 25 models.

**Figure 3: Distribution maps of predicted vectors of Zika virus in the continental US.**  
Maps of *Aedes* species are based on Centers for Disease Control and Prevention (2016). All other species' distributions are georectified maps from Darsie and Ward (2005).

# Predicted Zika Links

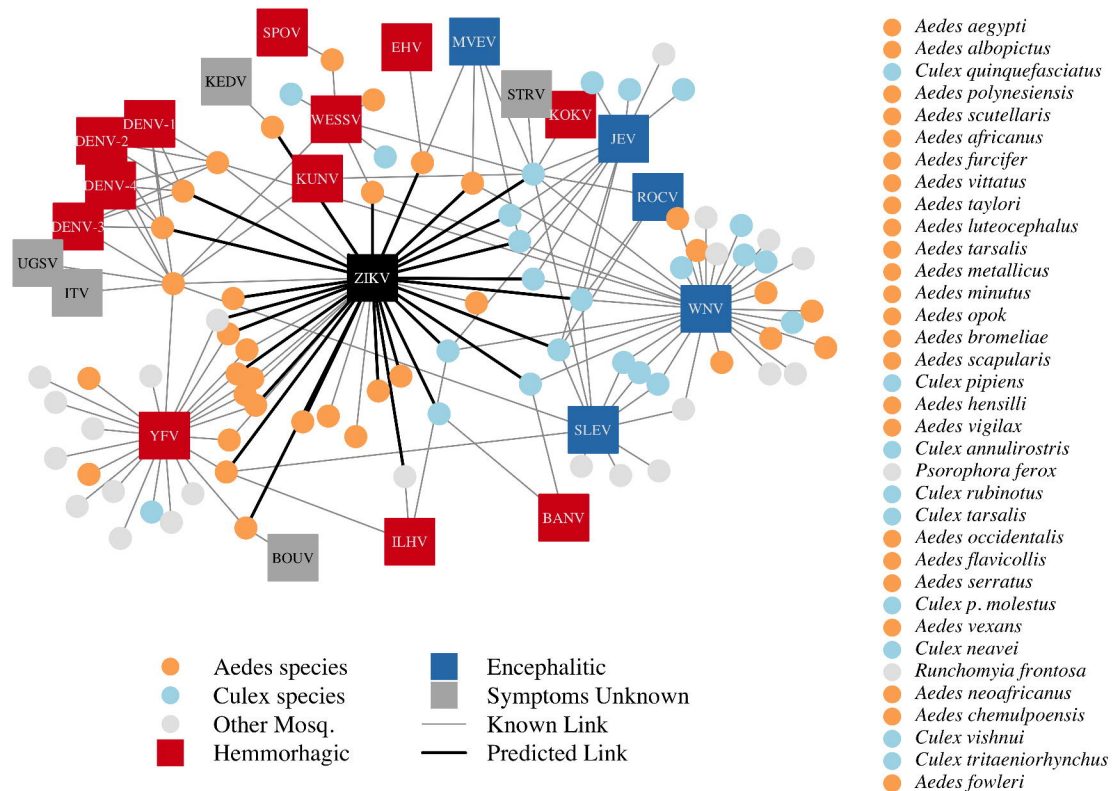

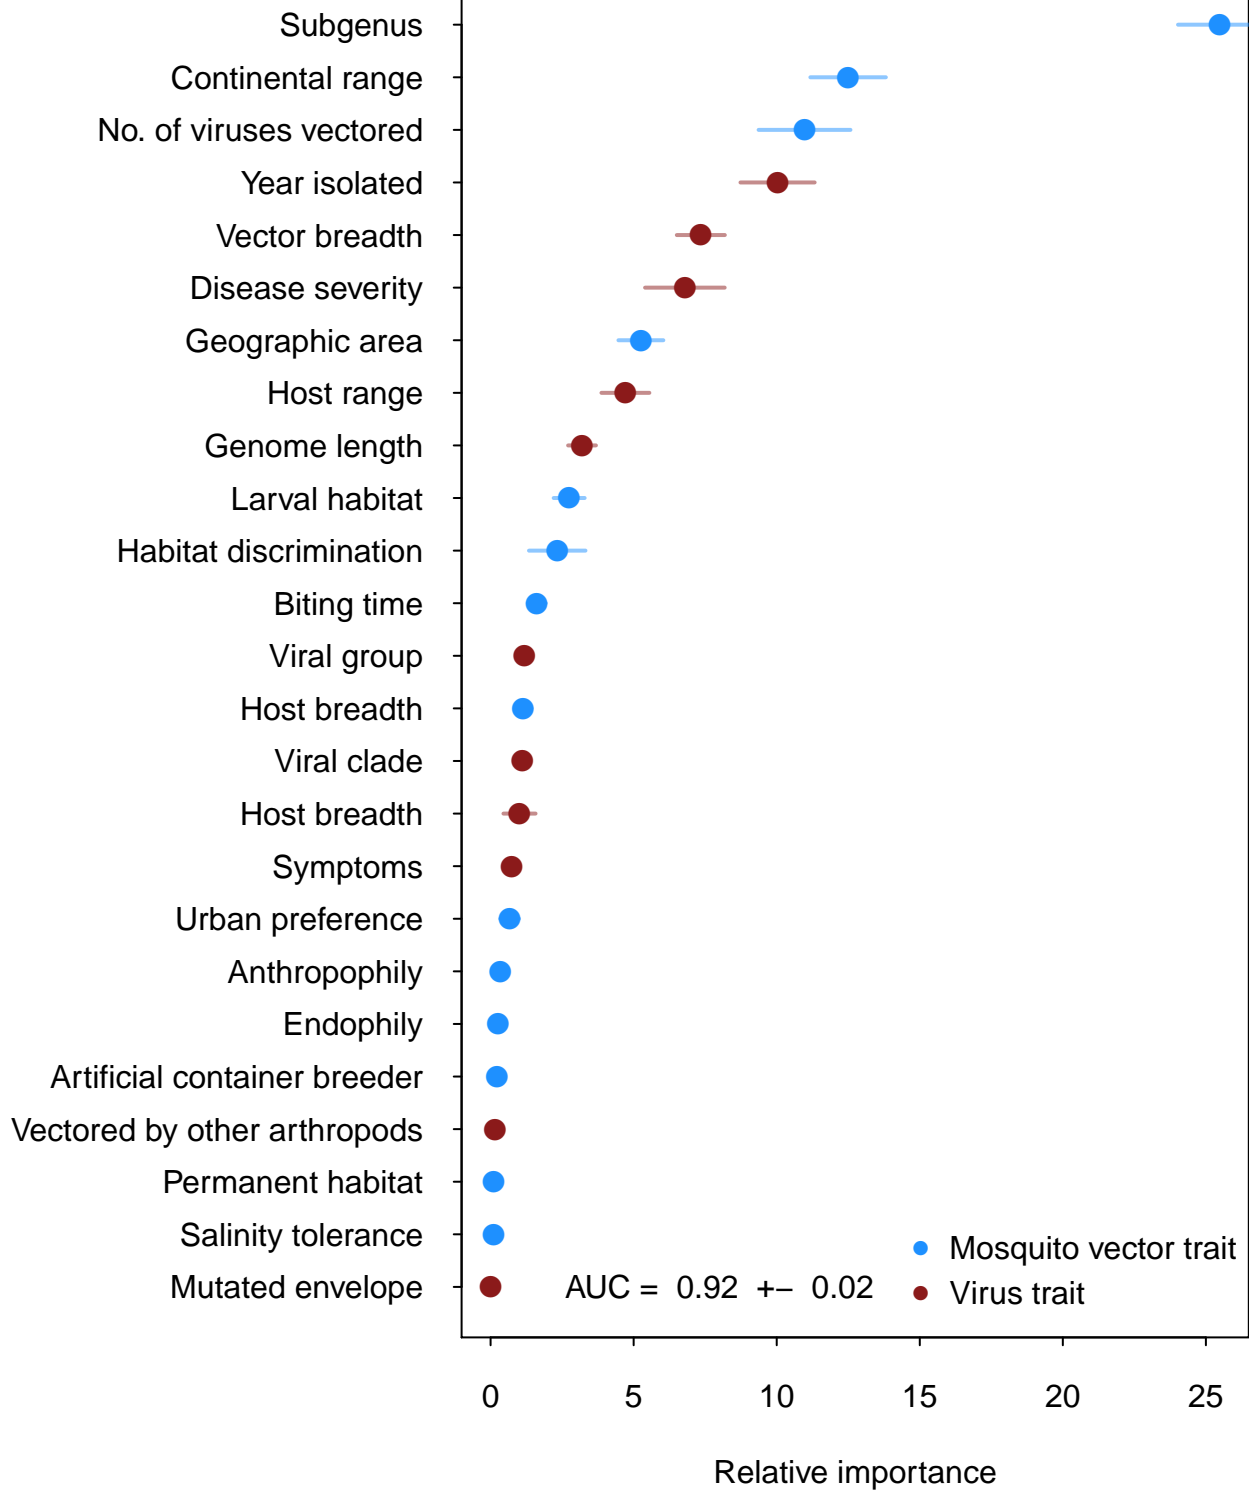



*Ae. aegypti*

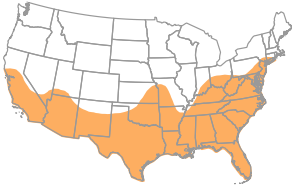

*Ae. albopictus*

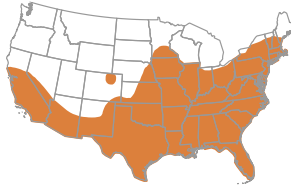

*Ps. ferox*

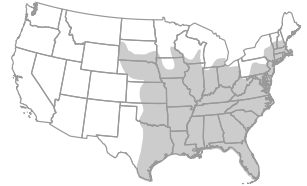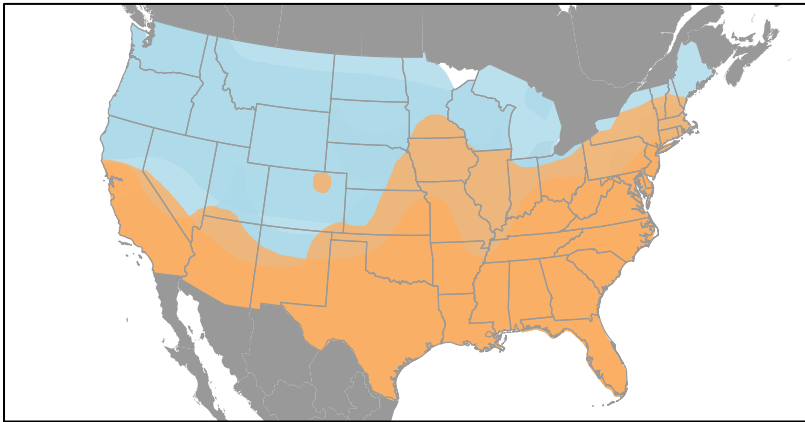

Distribution maps of predicted vectors of ZIKV in the continental US. *Aedes* species are shown in orange, *Culex* in blue and other genera in gray. Inset map represents overlay of all predicted vectors. The range of *Ae. vexans* encompasses the entire continental US and is not shown for clarity.

*Cx. pipiens*

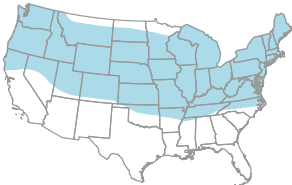

*Cx. quinquefasciatus*

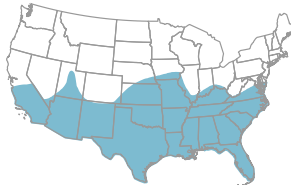

*Cx. tarsalis*

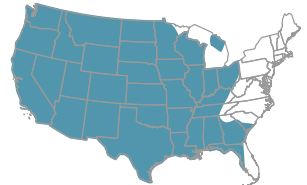

Source: http://biorxiv.org/content/10.1101/077966v2.full.pdf
